# Supplementary material
Source: Springer Nature journal article supplement (https://www.springermedizin.de/resource/supplementary/12884_2012_732_MOESM1_ESM.pdf/9458500)
Supplement: MOESM1 [file 9458500]

Survey Number \_\_\_\_\_

| ICCM SICK PATIENT REGISTER FOR CHILDREN 5 YEARS AND BELOW |     |     |                        |           |                |       |           |                             |     |               |               |         |                    |
|-----------------------------------------------------------|-----|-----|------------------------|-----------|----------------|-------|-----------|-----------------------------|-----|---------------|---------------|---------|--------------------|
| GENERAL INFO                                              |     |     | PROBLEM (past 2 weeks) |           |                |       | TREATMENT |                             |     |               |               |         |                    |
| Q55                                                       | Q56 | Q57 | Q58                    | Q59       | Q60            | Q61   | Q62       | Q63                         | Q64 | Q65           | Q66           | Q67     |                    |
| Patient Name                                              | Sex |     | Age in months          | Diarrhoea | Fast Breathing | Cough | Fever     | Treated at HC within 24 hrs | ORS | Breastfeeding | Home Solution | Tablets | Traditional Remedy |
|                                                           | M   | F   |                        |           |                |       |           |                             |     |               |               |         |                    |
|                                                           |     |     |                        |           |                |       |           |                             |     |               |               |         |                    |
|                                                           |     |     |                        |           |                |       |           |                             |     |               |               |         |                    |
|                                                           |     |     |                        |           |                |       |           |                             |     |               |               |         |                    |
|                                                           |     |     |                        |           |                |       |           |                             |     |               |               |         |                    |
|                                                           |     |     |                        |           |                |       |           |                             |     |               |               |         |                    |
|                                                           |     |     |                        |           |                |       |           |                             |     |               |               |         |                    |
|                                                           |     |     |                        |           |                |       |           |                             |     |               |               |         |                    |
|                                                           |     |     |                        |           |                |       |           |                             |     |               |               |         |                    |

| HOUSEHOLD                        |                  |                  |                 |                  |                      |               |
|----------------------------------|------------------|------------------|-----------------|------------------|----------------------|---------------|
| WATER AND SANITATION             |                  |                  |                 |                  |                      |               |
| Q68                              | Q69              | Q70              | Q71             | Q72              |                      |               |
| Time Spent Fetching Water (MINS) | # Litres per Day | Latrine is Clean | Water Treatment | Before Eating    | After Changing Baby  | After Latrine |
|                                  |                  |                  |                 | Before Food Prep | Before Breastfeeding |               |
| 5 CRITICAL TIMES                 |                  |                  |                 |                  |                      |               |

**FIELD NOTES**

**HOUSEHOLD: Water, Food and Sanitation**

*Find out if the household has unlimited access to the following methods to prevent sickness. Tick the boxes for the things the family has:*

|                                                                                                                                                           |                                                                                                                                                         |                                                                                                                                             |                                                                                                                                                            |                                                                                                                                                 |                                                                                                                                              |                                                                                                                                                                                |
|-----------------------------------------------------------------------------------------------------------------------------------------------------------|---------------------------------------------------------------------------------------------------------------------------------------------------------|---------------------------------------------------------------------------------------------------------------------------------------------|------------------------------------------------------------------------------------------------------------------------------------------------------------|-------------------------------------------------------------------------------------------------------------------------------------------------|----------------------------------------------------------------------------------------------------------------------------------------------|--------------------------------------------------------------------------------------------------------------------------------------------------------------------------------|
| <p>Q73 <input type="checkbox"/></p> 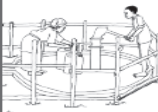 <p><b>Protected water source</b></p> | <p>Q74 <input type="checkbox"/></p>  <p><b>Safe drinking water</b></p> | <p>Q75 <input type="checkbox"/></p>  <p><b>Kitchen</b></p> | <p>Q76 <input type="checkbox"/></p>  <p><b>Drying rack for dishes</b></p> | <p>Q77 <input type="checkbox"/></p>  <p><b>Rubbish pit</b></p> | <p>Q78 <input type="checkbox"/></p>  <p><b>Latrine</b></p> | <p>Q79 <input type="checkbox"/></p>  <p><b>Hand-washing area with soap near latrine</b></p> |
|-----------------------------------------------------------------------------------------------------------------------------------------------------------|---------------------------------------------------------------------------------------------------------------------------------------------------------|---------------------------------------------------------------------------------------------------------------------------------------------|------------------------------------------------------------------------------------------------------------------------------------------------------------|-------------------------------------------------------------------------------------------------------------------------------------------------|----------------------------------------------------------------------------------------------------------------------------------------------|--------------------------------------------------------------------------------------------------------------------------------------------------------------------------------|

*Follow up on anything the family is missing.*
